# Supplementary material for: CaF2:Eu films shine novel blue, white or red luminescence though adjustment of the valence state of Eu ions using the electro-deposition method
Source: Royal Society of Chemistry journal article supplement (doi:10.1039/c7tc04079b), 2017-01-01
Supplement: c7tc04079b1.pdf [file c7tc04079b1.pdf]

# CaF<sub>2</sub>: Eu Films Shine Novel Blue, White or Red luminescence through Adjustment of Valence state of Eu Ions using Electro-deposition Method

Hong Jia,<sup>\*a, b</sup> Zhi Chen,<sup>\*c</sup> Zhongli Liu,<sup>a</sup> Jianguo Zhao,<sup>a</sup> Chaoliang Ding,<sup>a</sup> Haifeng Yang,<sup>a</sup> Weiyang Zhang,<sup>a</sup> Xiaofeng Liu,<sup>b</sup> and Jianrong Qiu,<sup>\* b, c</sup>

Received (in XXX, XXX) Xth XXXXXXXXXX 20XX, Accepted Xth sXXXXXXXXXX 20XX

DOI: 10.1039/b000000x

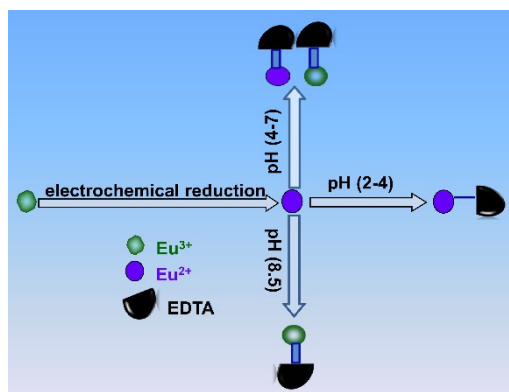

**Scheme S1.** Schematic illustration for the formation of Eu<sup>2+</sup>/Eu<sup>3+</sup> ions in preparation of CaF<sub>2</sub>: Eu film.

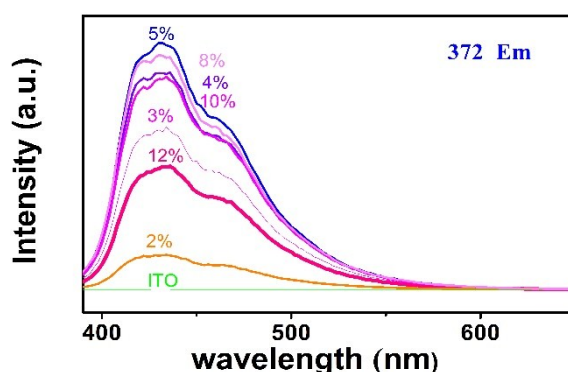

**Figure S1.** Emission spectra from the CaF<sub>2</sub>: Eu thin films.

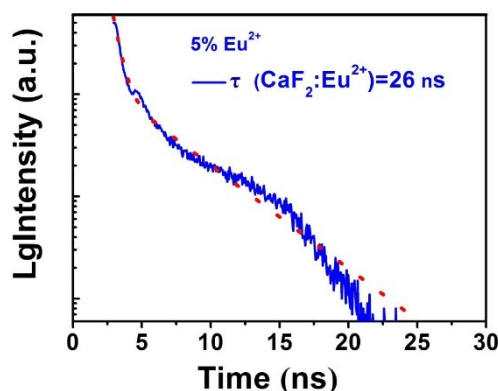

**Figure S2** Time evolution of blue (425 nm) (under pulsed 372 nm excitation from 372 nanosecond laser) from a thin film of the CaF<sub>2</sub>: 5% Eu, prepared at pH=3.5.

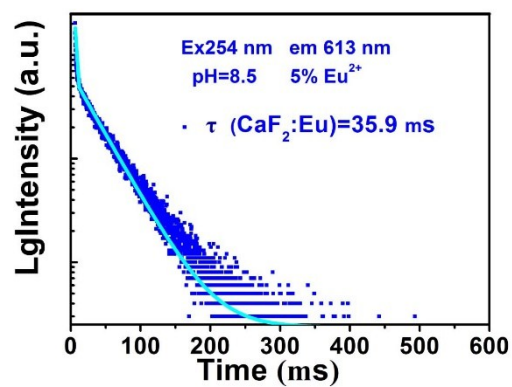

**Figure S3.** Time evolution of the red (613nm) emission under pulsed 254 nm excitation, from a thin film of the  $\text{CaF}_2$ : 5% Eu, prepared at pH=8.5

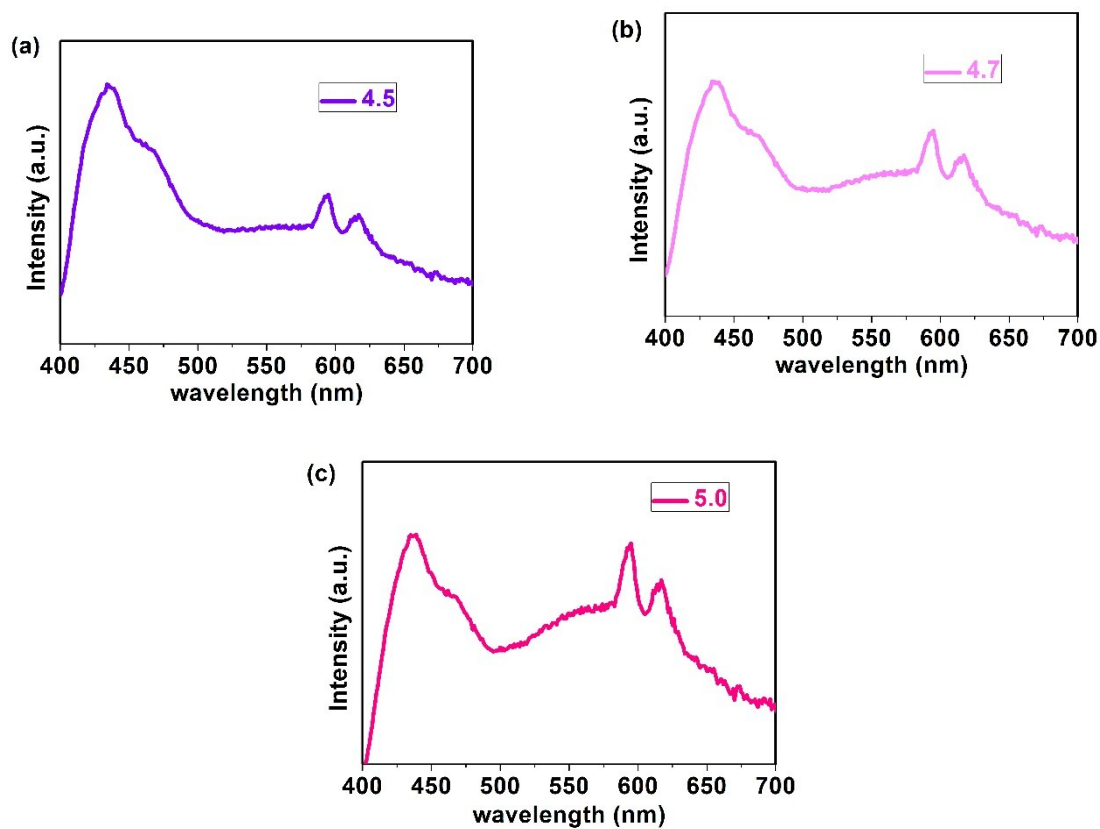

**Figure S4.** Emission spectra of the  $\text{CaF}_2$ : Eu films prepared at (a) pH=4.5, (b) pH=4.7, (c) pH=5.0.
